# Supplementary material
Source: PubMed Central journal article supplement (PMC10524828)
Supplement: NIHMS1896265-supplement-1.pdf [file NIHMS1896265-supplement-1.pdf]

# Supplemental Figures

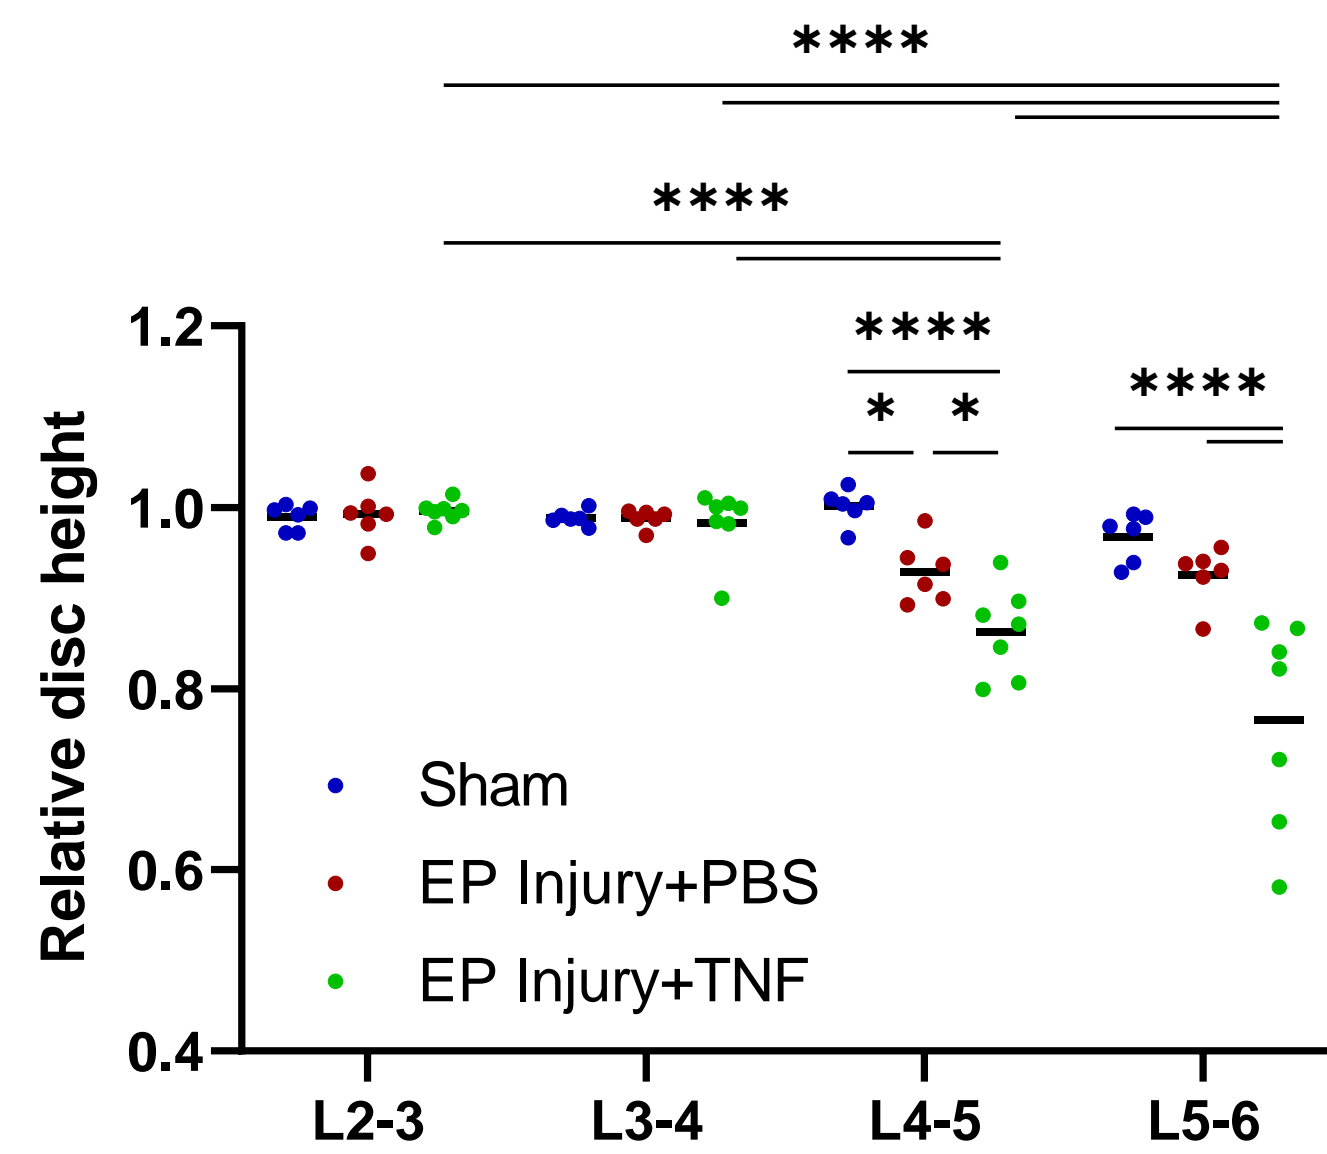

Supplementary Figure 1:

Sham

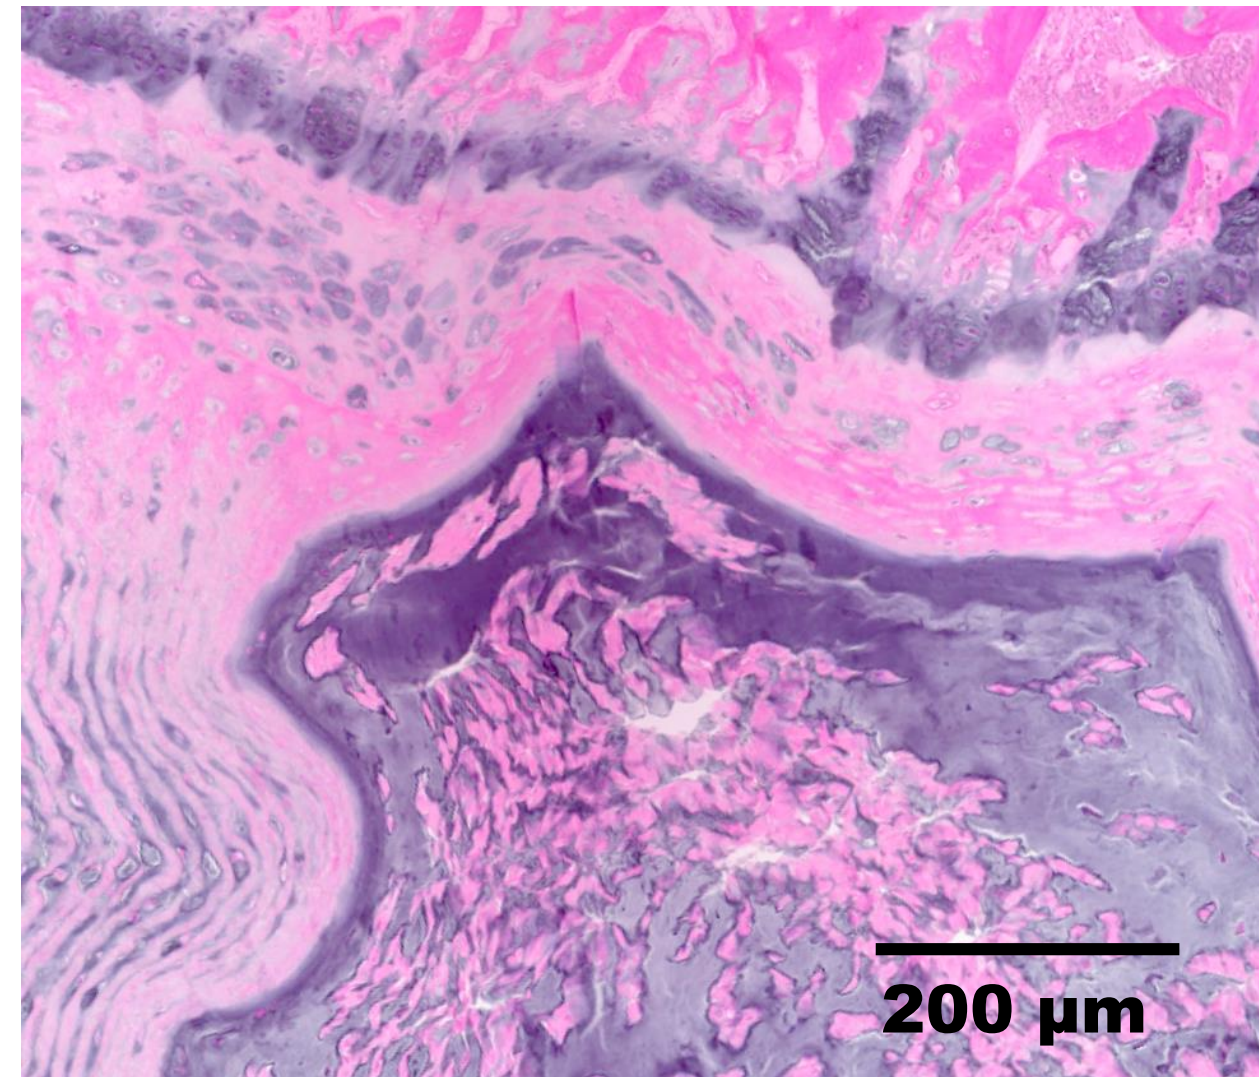

EP+ PBS

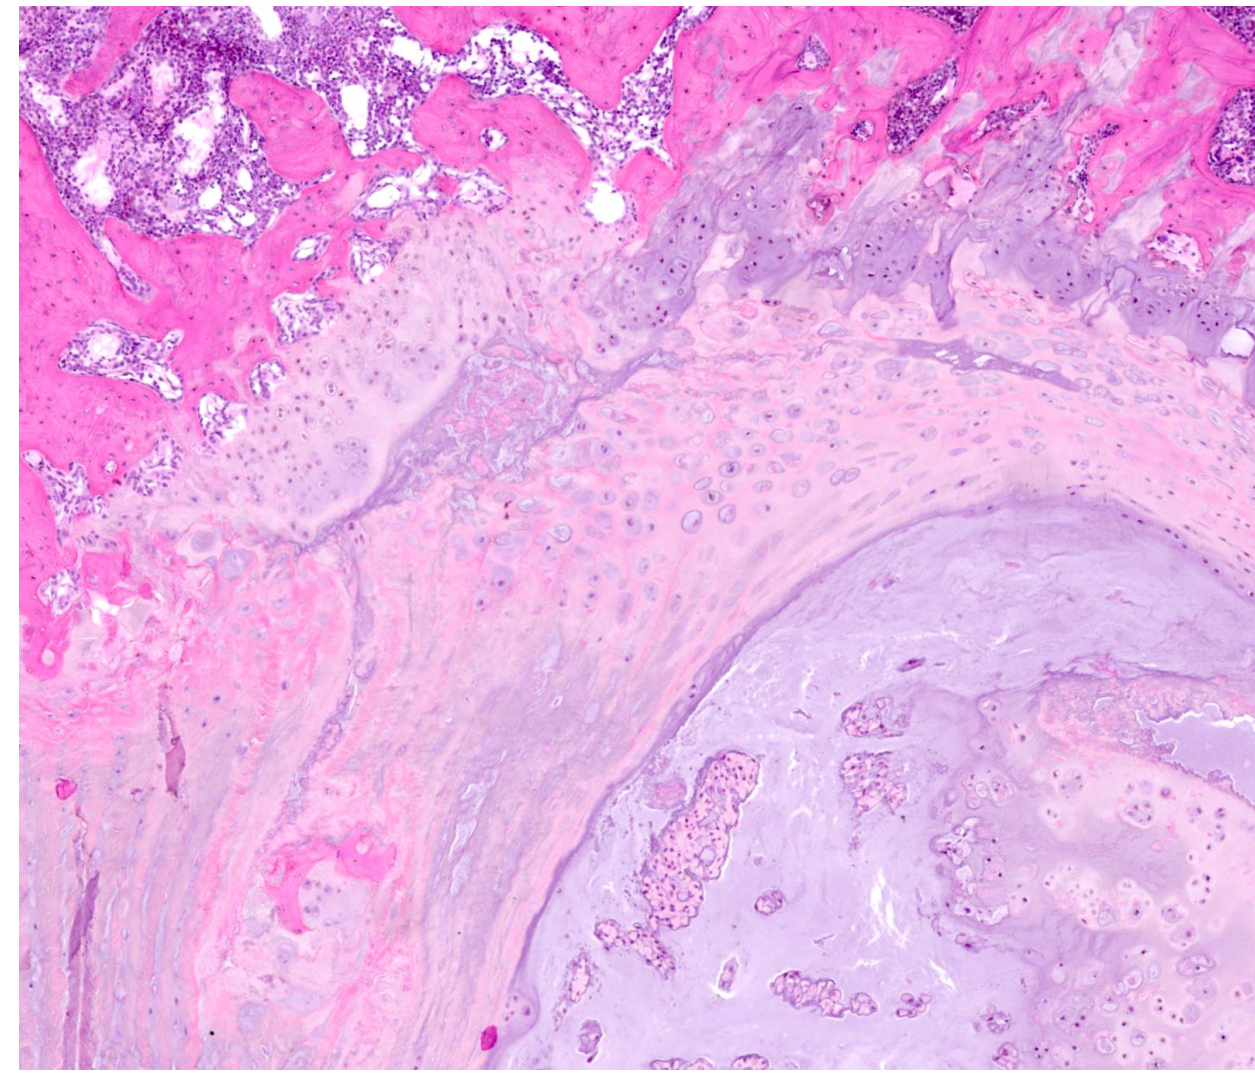

EP+ TNF $\alpha$

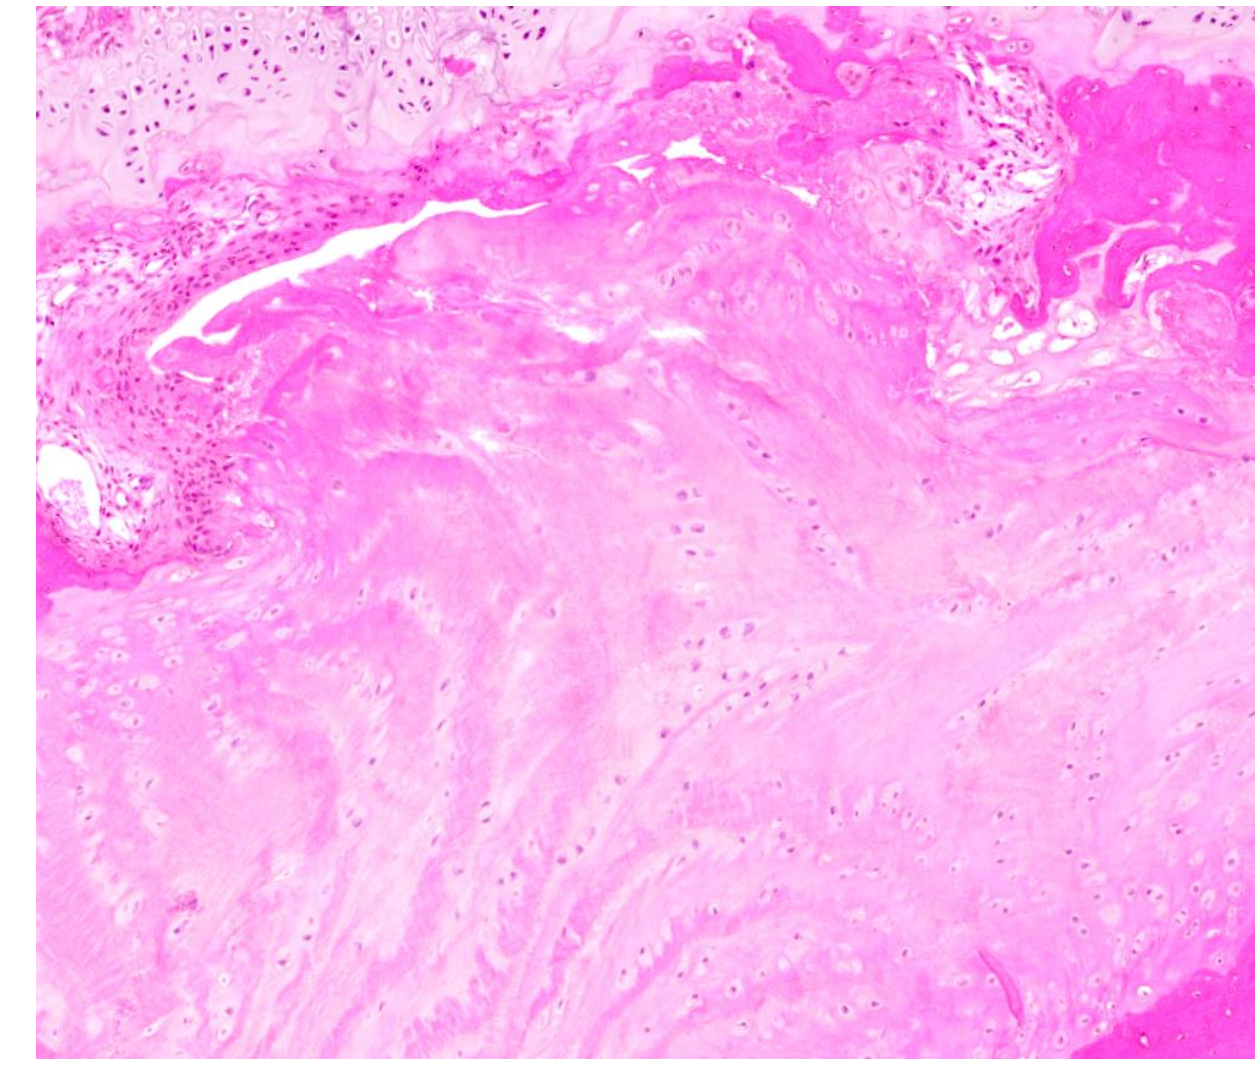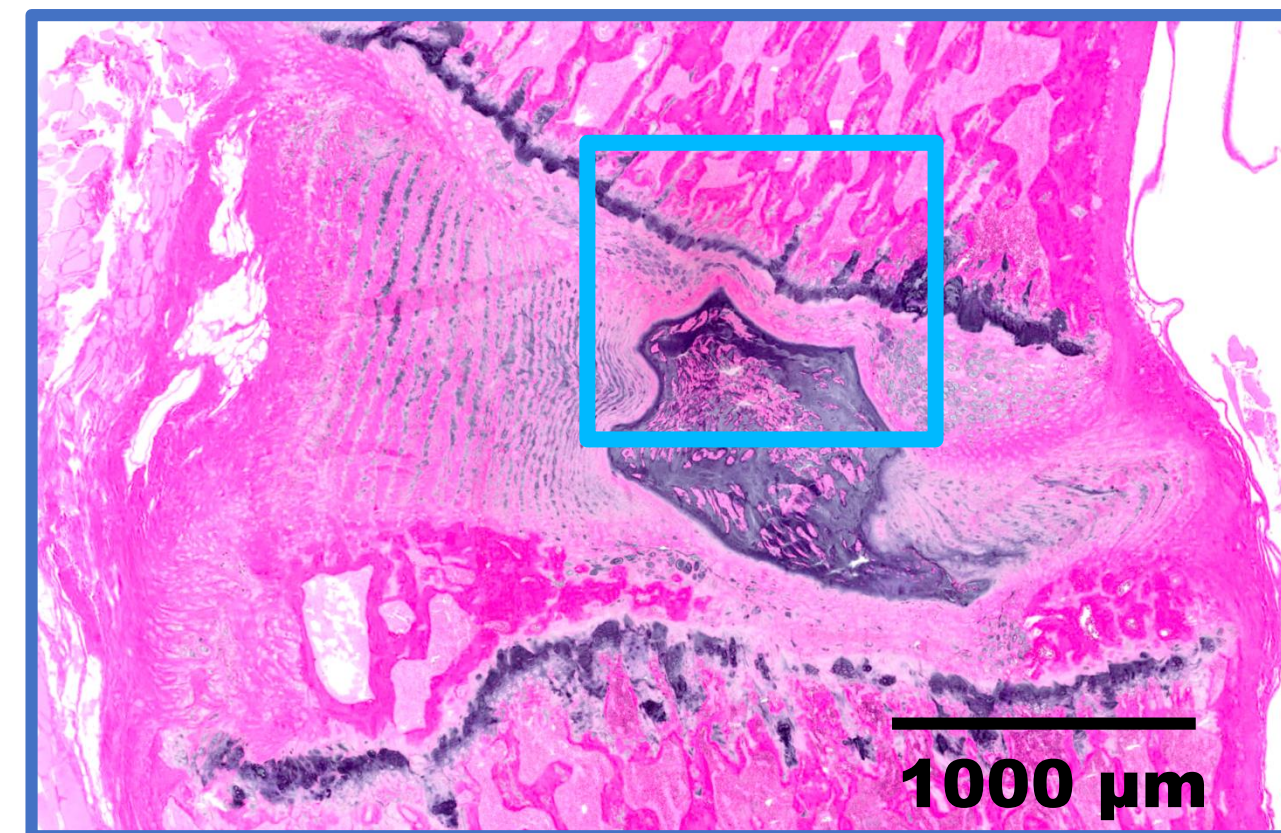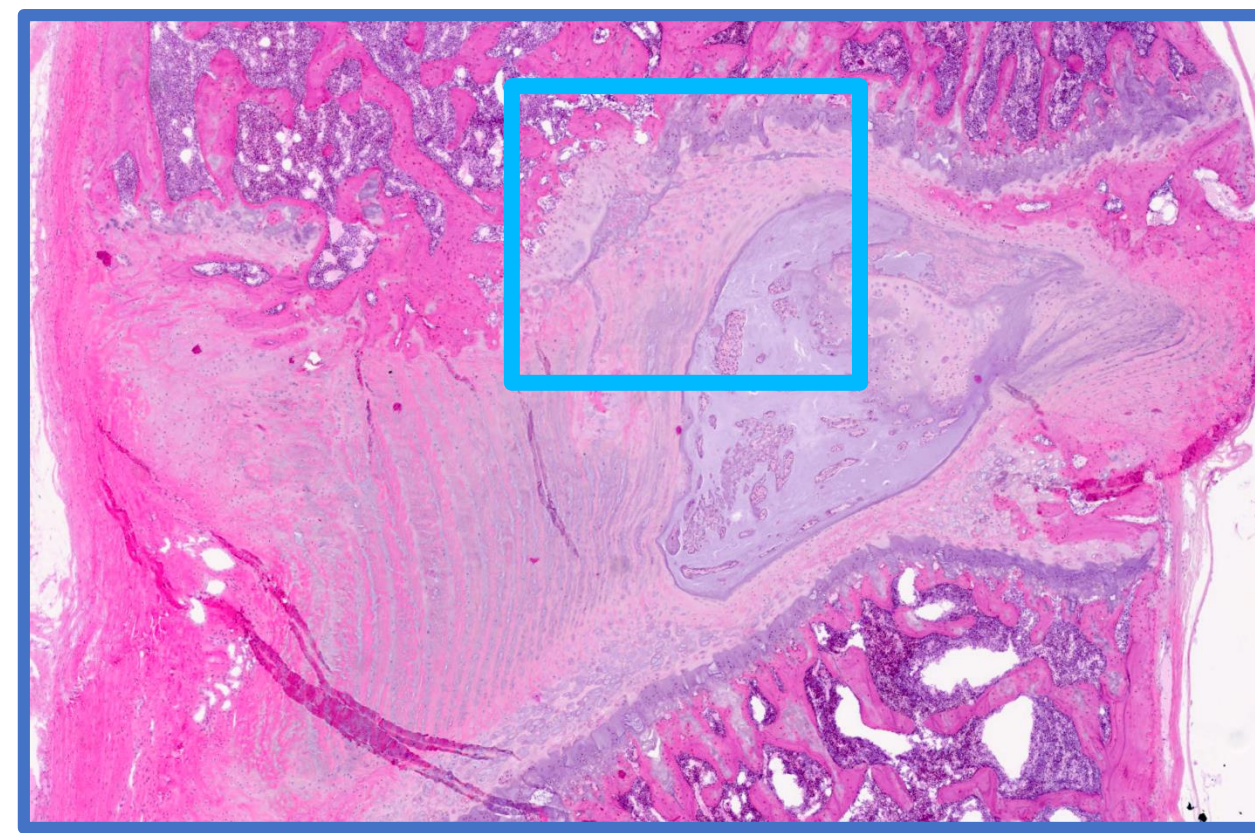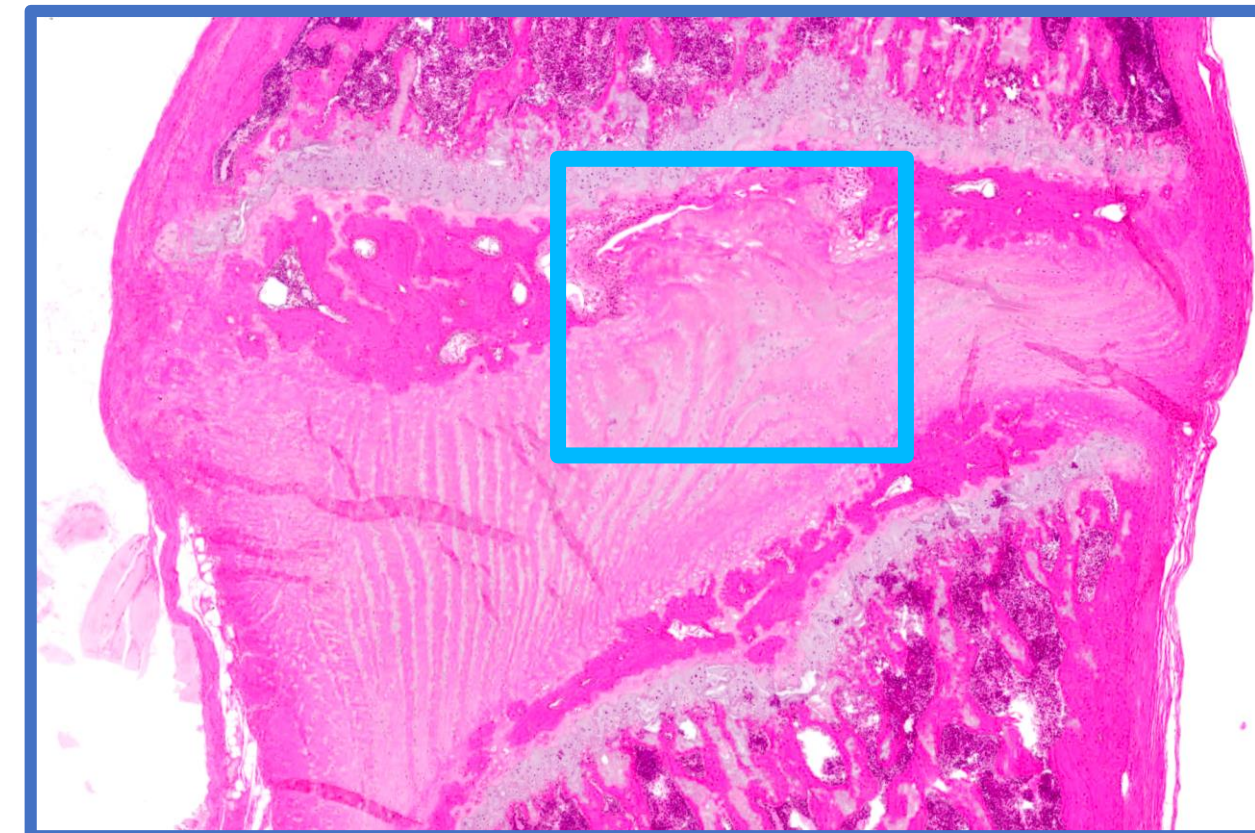

Supplementary Figure 2:

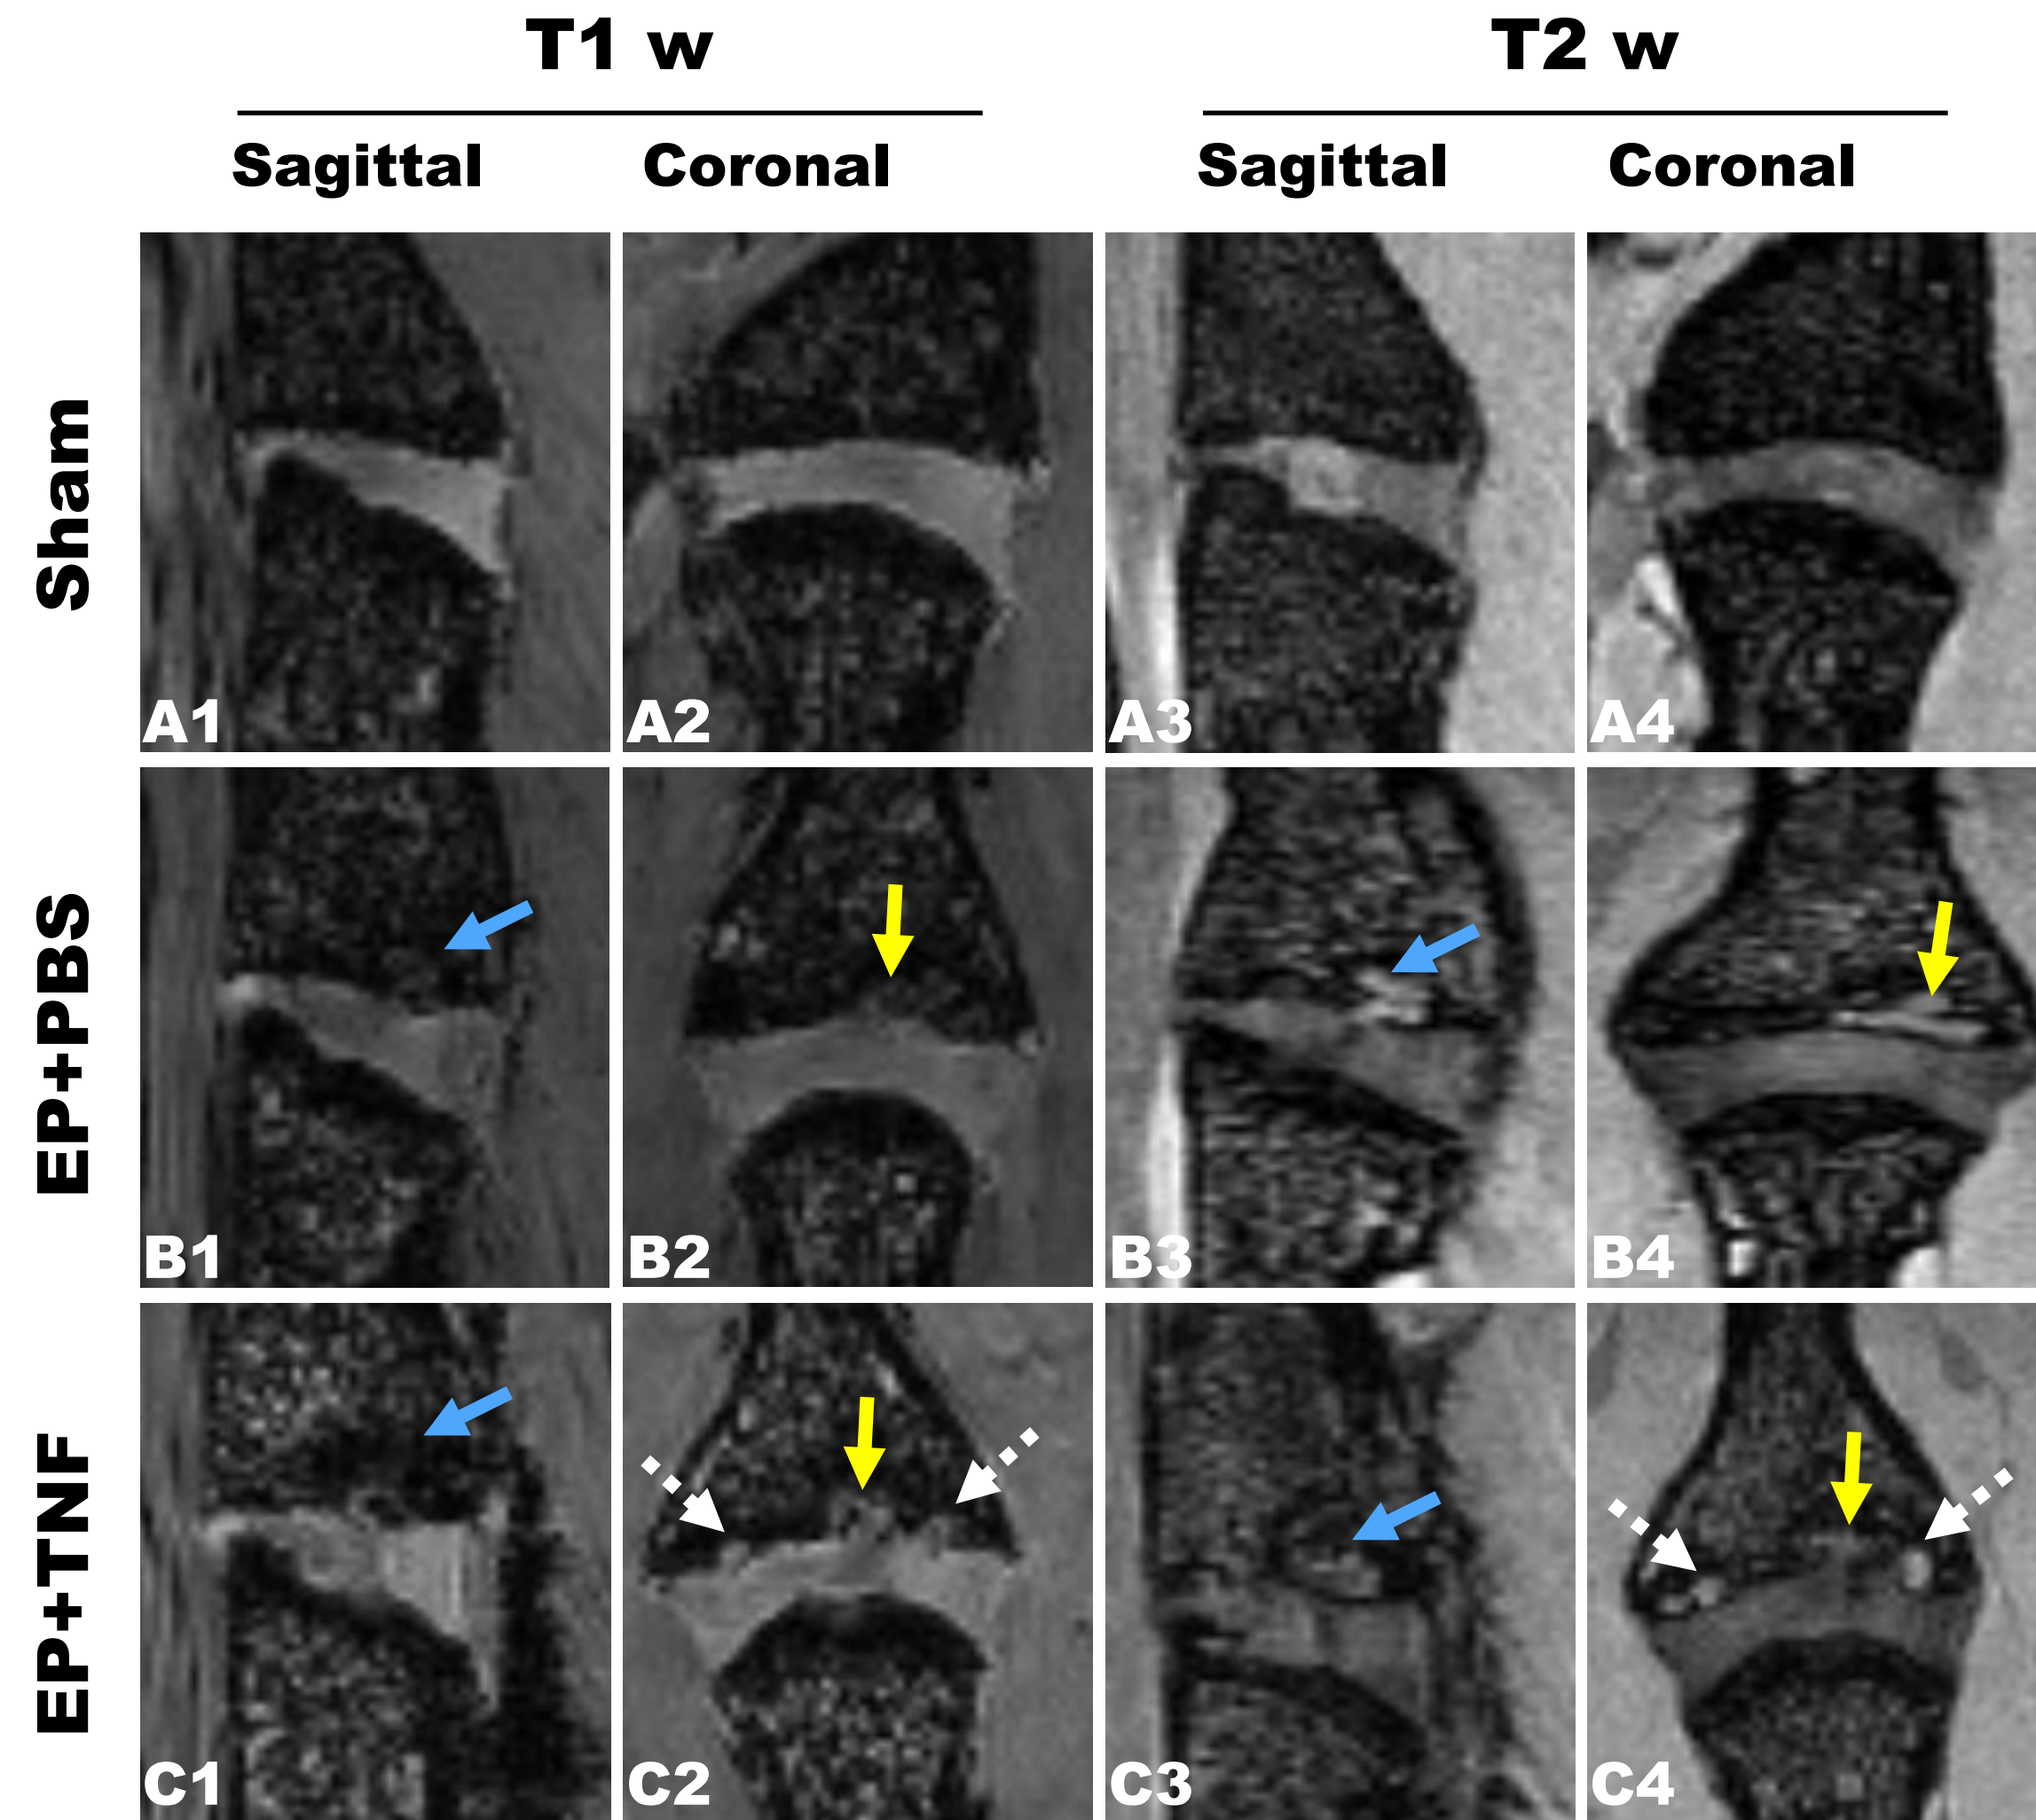

Supplementary Figure 3:
